# Supplementary material
Source: ML conference proceedings conference paper supplement (https://openreview.net/forum?id=jFlt7lbZoB)
Supplement: supplementary_material [file attachment]

# Supplementary Materials: Controllable Foreground Relighting in Image Compositing via Diffusion Model

Anonymous Authors

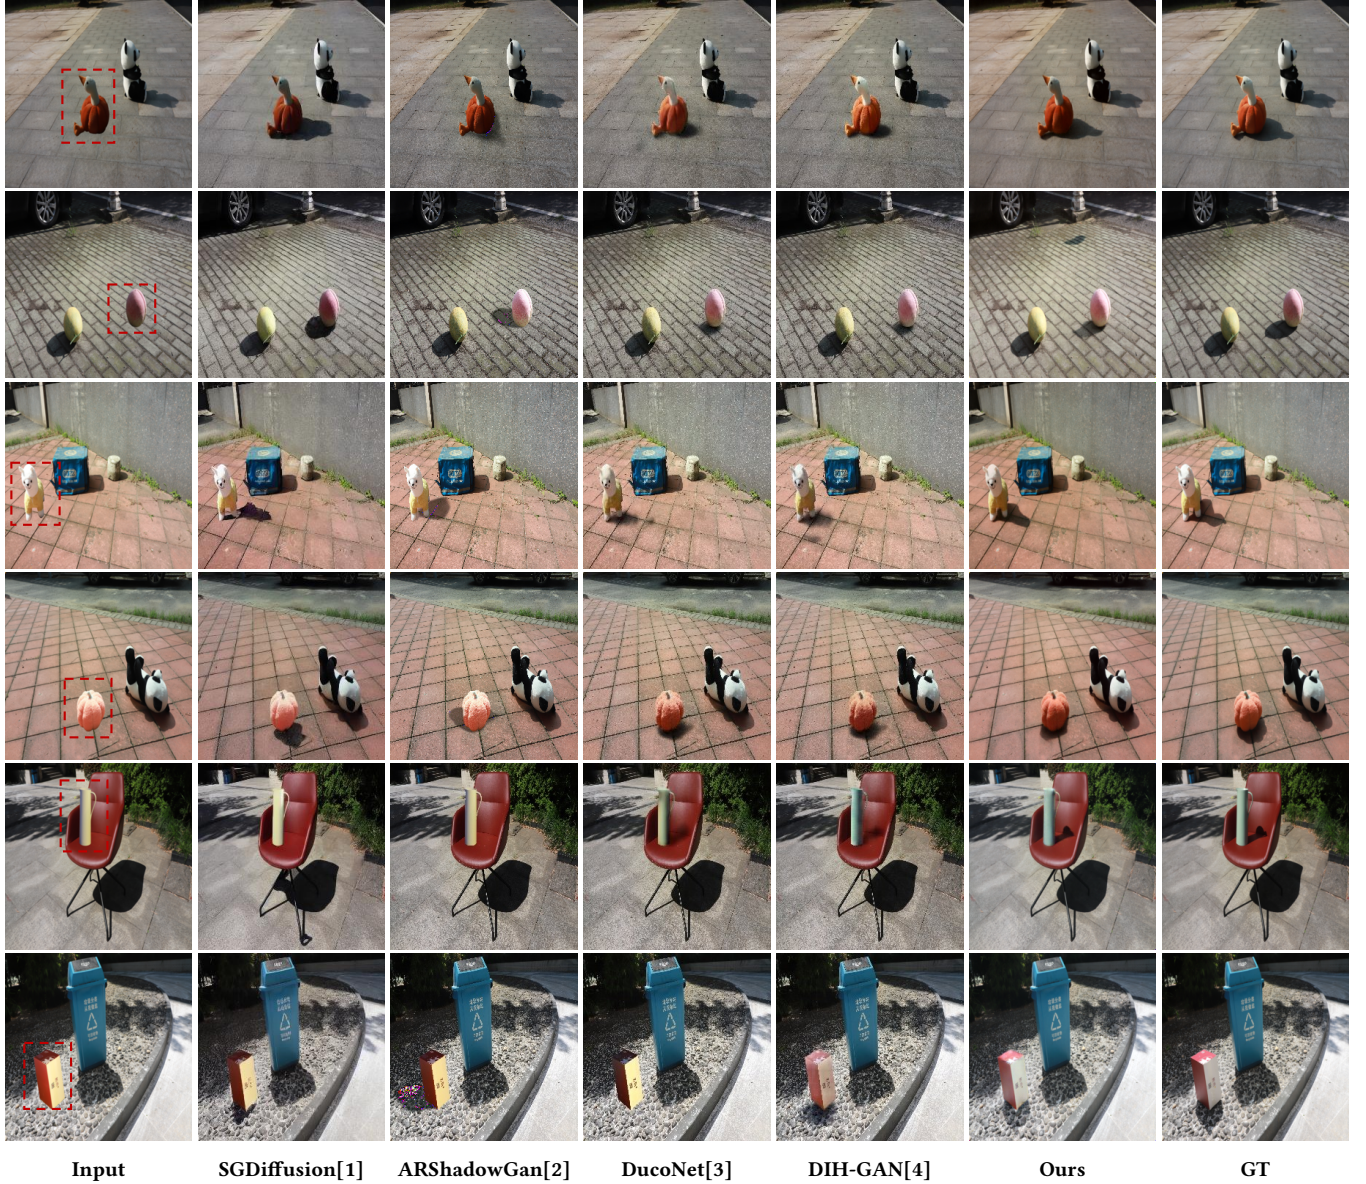

Input SGDiffusion[1] ARShadowGan[2] DucoNet[3] DIH-GAN[4] Ours GT

Figure 1: In this supplementary material, we present additional visual comparison results

## 1 RESEARCH METHODS

"As shown in Figure 1, we provide additional comparative experimental results. Furthermore, Table 1 illustrates the structure of a single layer encoder with foreground content enhancement module."

## REFERENCES

- [1] Qingyang Liu, Junqi You, Jianting Wang, Xinhao Tao, Bo Zhang, and Li Niu. Shadow generation for composite image using diffusion model. *arXiv preprint arXiv:2403.15234*, 2024.
- [2] Daquan Liu, Chengjiang Long, Hongpan Zhang, Hanning Yu, Xinzhi Dong, and Chunxia Xiao. Arshadowgan: Shadow generative adversarial network for augmented reality in single light scenes. In *2020 IEEE/CVF Conference on Computer Vision and Pattern Recognition (CVPR)*, Jun 2020.

Table 1

| name                      | layers           |
|---------------------------|------------------|
| TimestepEmbedSequential   | Conv2d           |
| 2-TimestepEmbedSequential | ResBlock         |
| SpatialTransformer        | GroupNorm        |
|                           | Conv2d           |
|                           | TransformerBlock |
|                           | Conv2d           |
| refineBlock               | GroupNorm        |
|                           | GroupNorm        |
|                           | Conv2d           |
|                           | Conv2d           |
|                           | Conv2d           |
|                           | GroupNorm        |
|                           | Conv2d           |
|                           | Conv2d           |
| 3-TimestepEmbedSequential | Downsample       |

[3] Linfeng Tan, Jiangtong Li, Li Niu, and Liqing Zhang. Deep image harmonization in dual color spaces. Aug 2023.

[4] Zhongyun Bao, Chengjiang Long, Gang Fu, Daquan Liu, Yuanzhen Li, Jiaming Wu, and Chunxia Xiao. Deep image-based illumination harmonization.
